# Supplementary material
Source: PubMed Central journal article supplement (PMC2965593)
Supplement: NIHMS242473-supplement-supplementary_data.pdf [file NIHMS242473-supplement-supplementary_data.pdf]

## **Supporting Information**

### **Antibacterial Activity and Cytotoxicity of PEGylated Poly(amidoamine) Dendrimers**

*Analette I. Lopez,<sup>a</sup> Rose Y. Reins,<sup>b</sup> Alison M. McDermott,<sup>b</sup> Barbara W. Trautner<sup>c</sup> and Chengzhi Cai<sup>a\*</sup>*

<sup>a</sup>*Department of Chemistry and* <sup>b</sup>*College of Optometry, University of Houston, Houston, TX, 77204, and*

<sup>c</sup>*Department of Medicine, Infectious Diseases Section, Baylor College of Medicine, Houston, TX, 77030*

*Email: [cai@uh.edu](mailto:cai@uh.edu); Fax: (713)-743-2710*

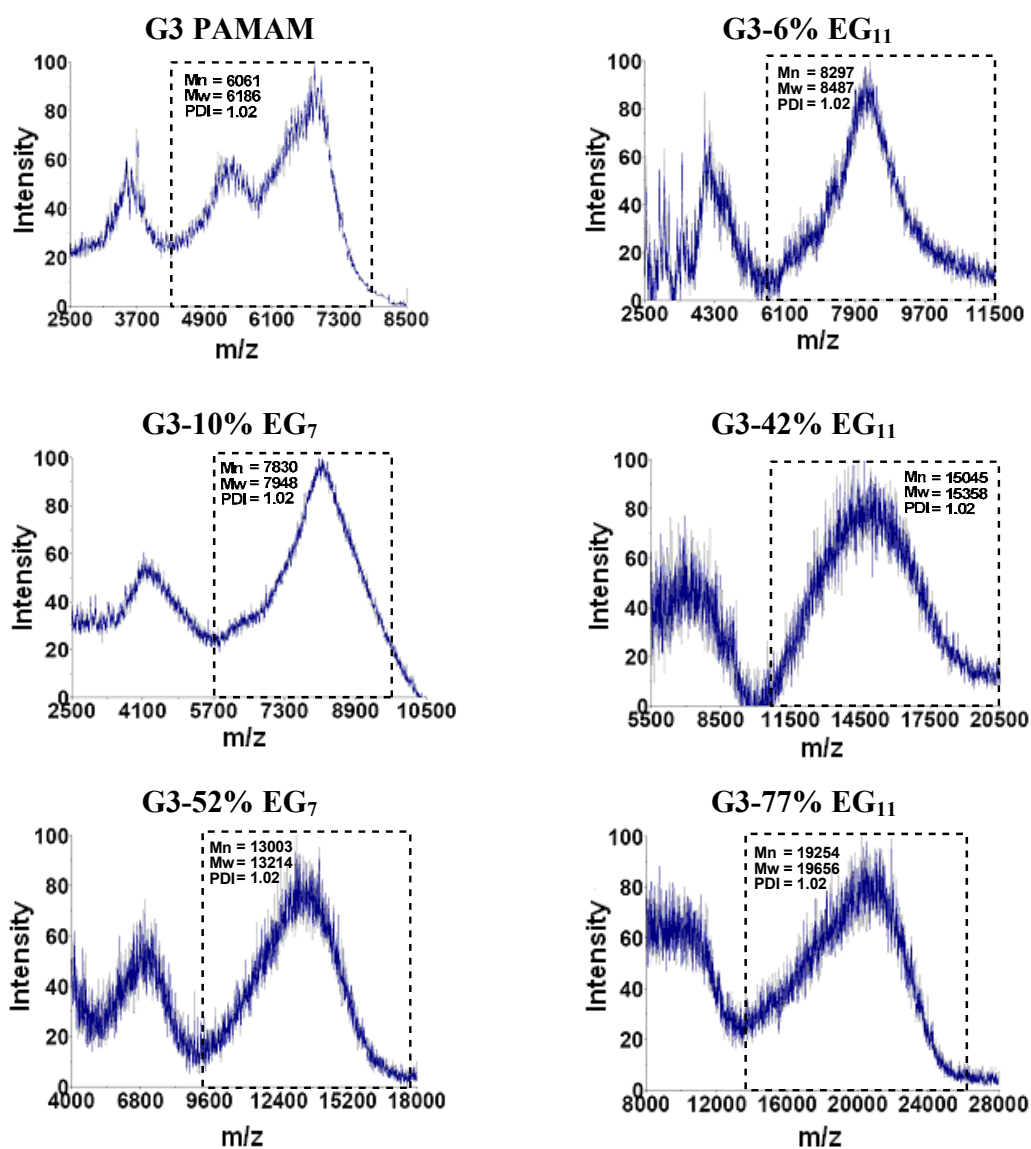

**Fig. S1** MALDI Spectra of G3 PAMAM dendrimer and its PEGylated derivatives. Boxed are the regions selected for number and weight average molecular weight (Mn and Mw) and PDI calculations.

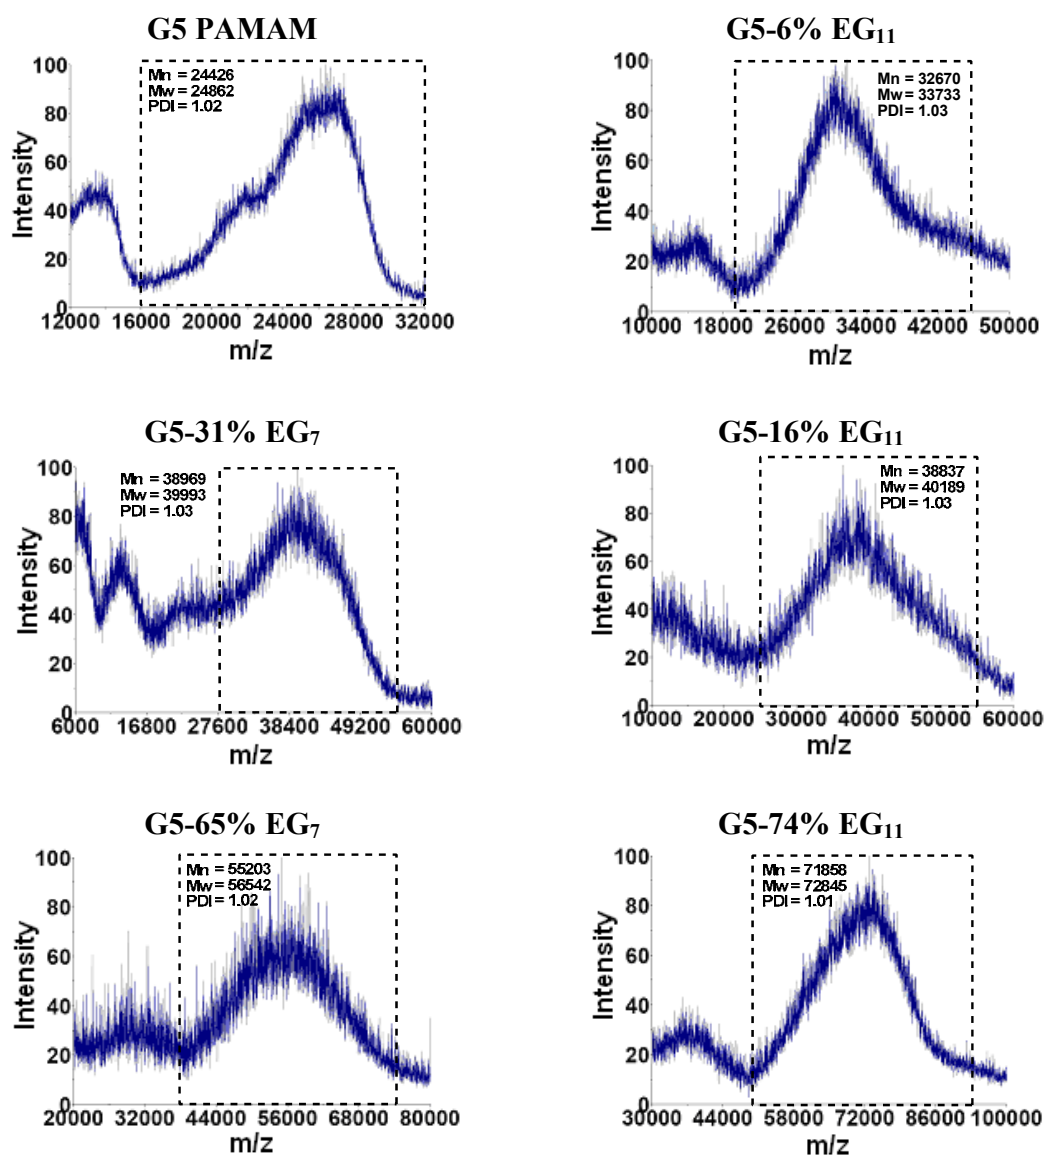

**Fig. S2** MALDI Spectra of G5 PAMAM dendrimer and its PEGylated derivatives. Boxed are the regions selected for number and weight average molecular weight (Mn and Mw) and PDI calculations.

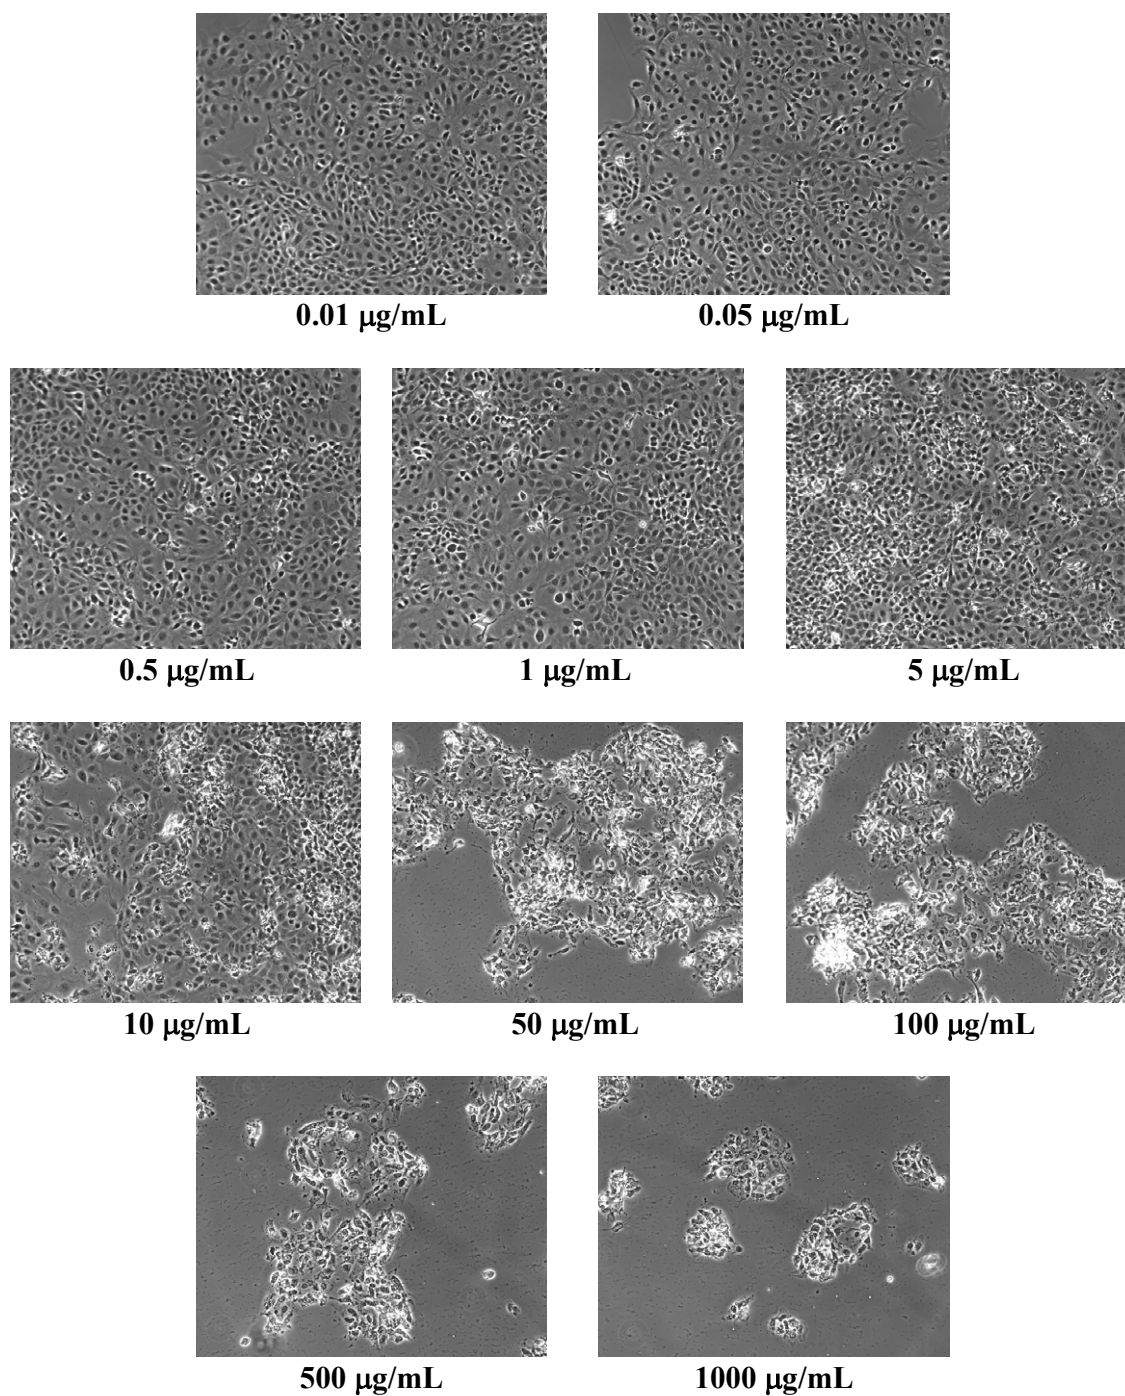

**Fig. S3** Phase contrast images of HCECs treated with various concentrations of G5 PAMAM dendrimer, obtained with an Olympus BX 51 fluorescence microscope using a 10x objective.
